# Supplementary material
Source: PubMed Central journal article supplement (PMC3161170)
Supplement: NIHMS289435-supplement-1.pdf [file NIHMS289435-supplement-1.pdf]

## Supplementary Figure 1

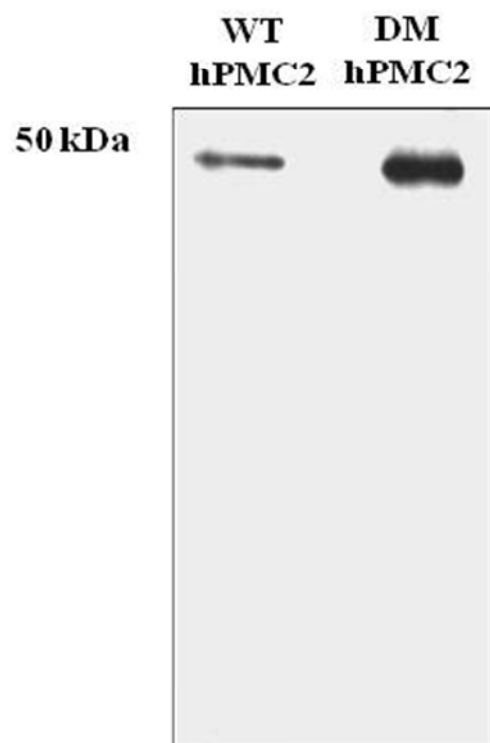

Supplementary Figure 2

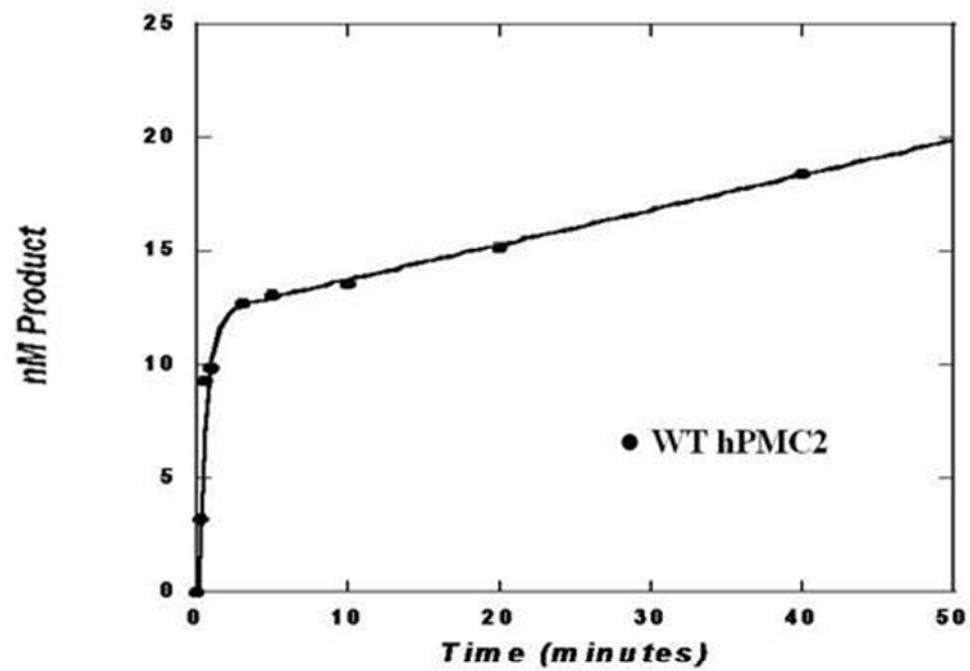

Supplementary Figure 3

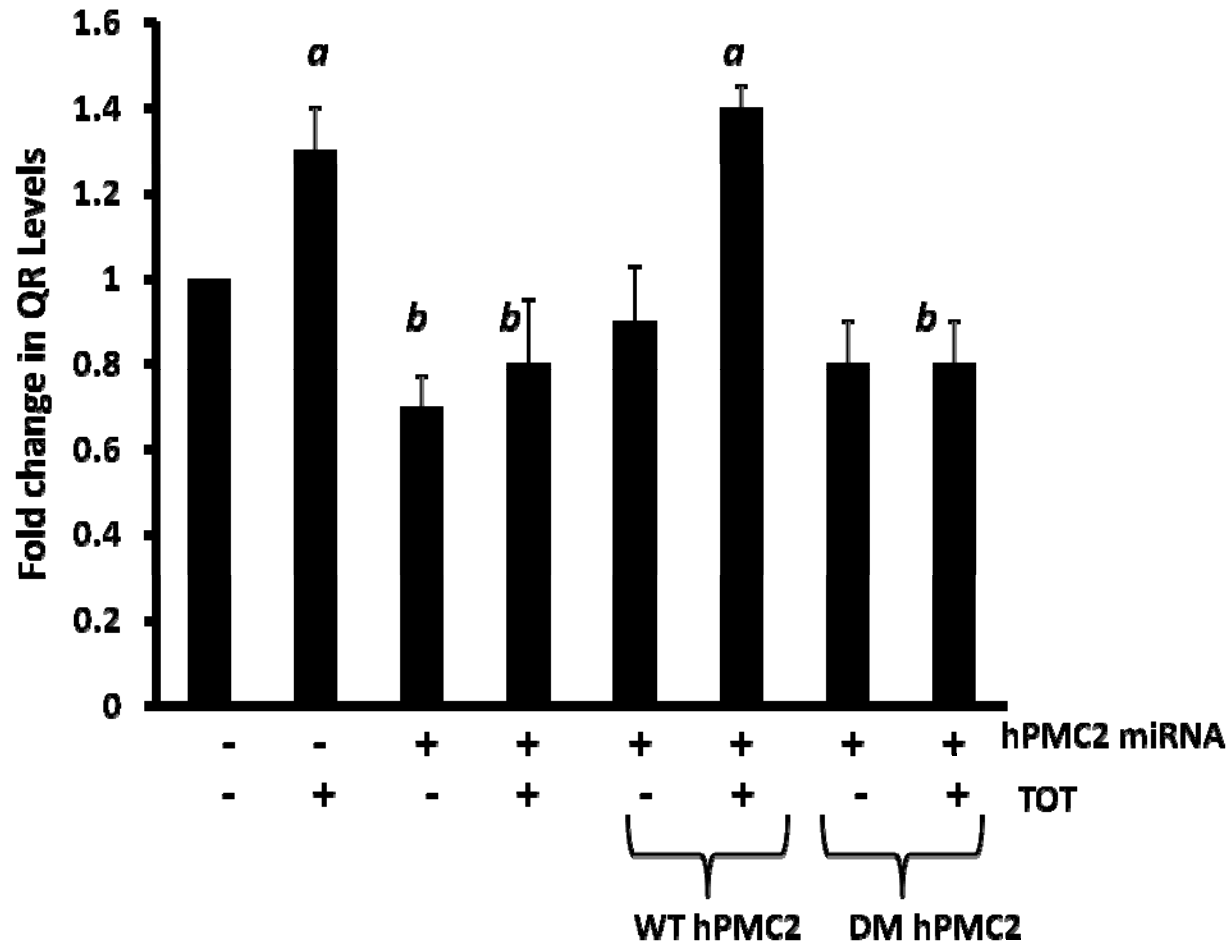

## Supplementary Figure 4

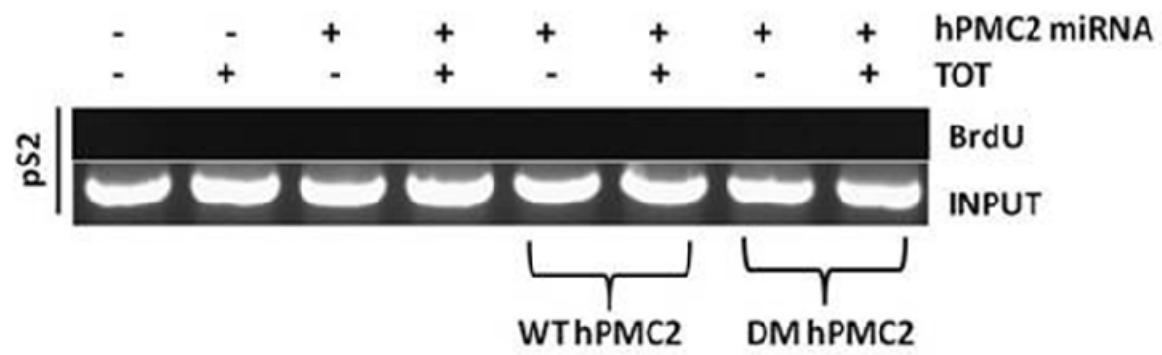

## Supplementary Figure 5

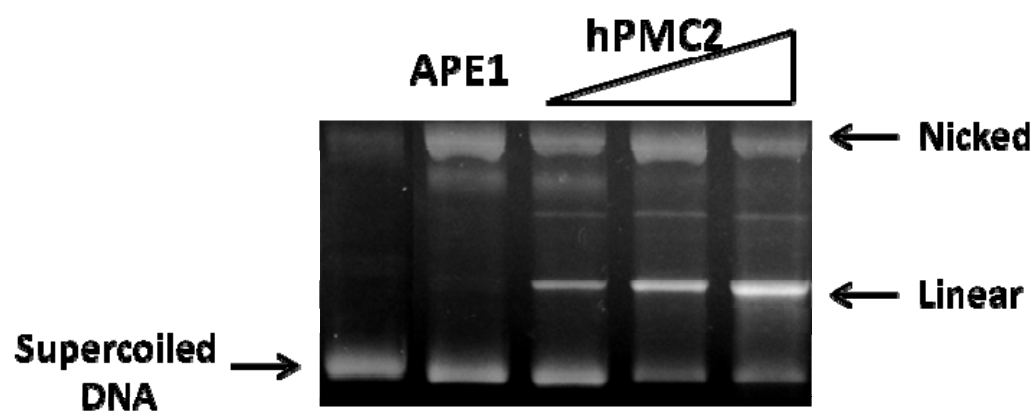

Supplementary Figure 6

A

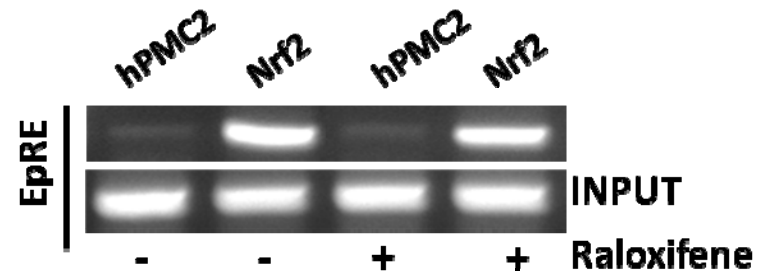

B

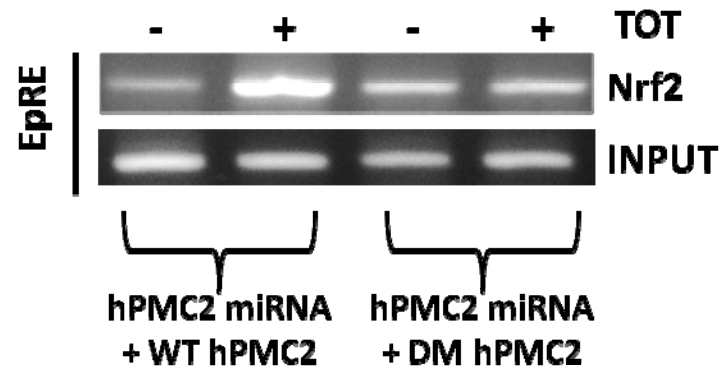

Supplementary Figure 7

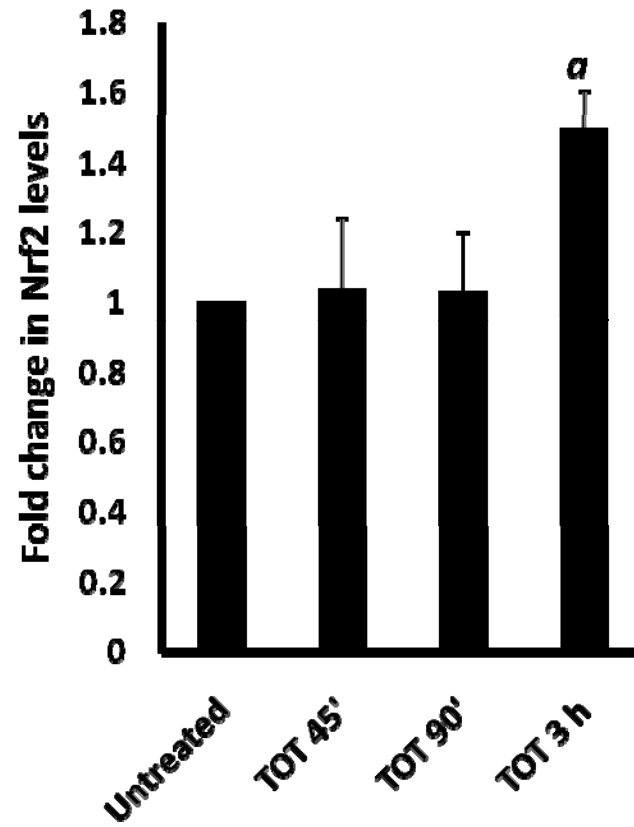

Supplementary Figure 8

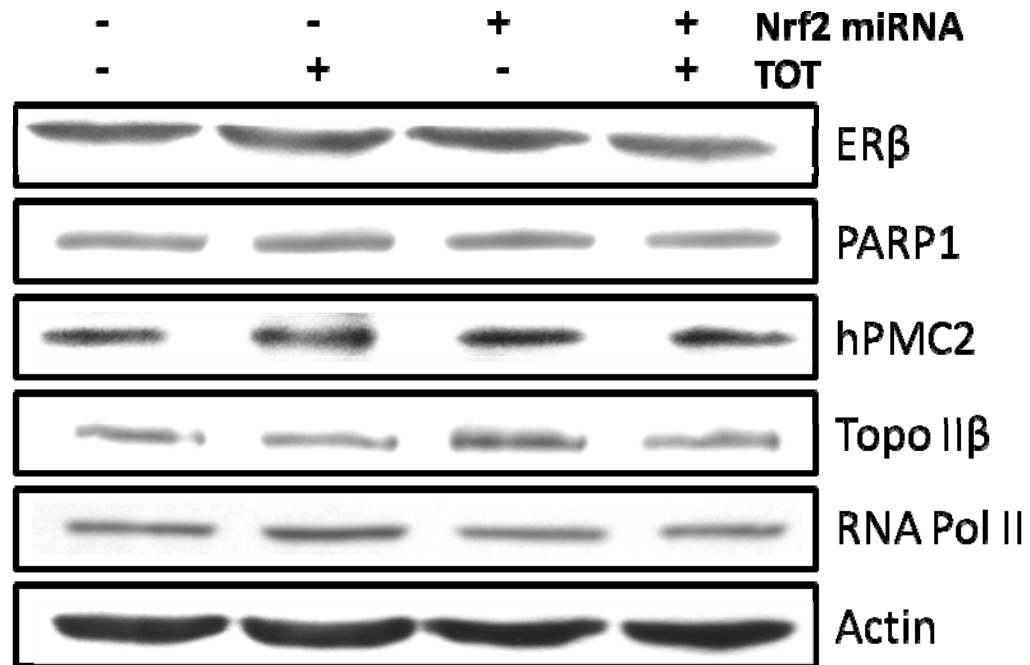



## Supplementary Figure 9

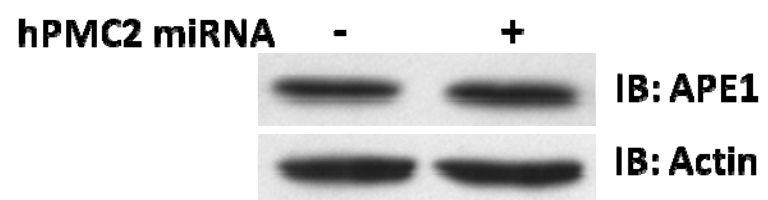

| Oligonucleotide                   | Sequence (5'-3')                                                  |
|-----------------------------------|-------------------------------------------------------------------|
| hPMC2 2236 miRNA<br>top strand    | TGCTGTTGTCAGTGCCACTGGCTGTTGTTTTGGCCACTGACTGACAACAGCCAGGCACTGACAA  |
| hPMC2 2236 miRNA<br>bottom strand | CCTGTTGTCAGTGCCTGGCTGTTGTCAGTCAGTGGCCAAAACAACAGCCAGTGGCACTGACAAC  |
|                                   |                                                                   |
| Nrf2 miRNA<br>top strand          | TGCTGTTTCCTTGTCGCTCCAGAAGTTTTGGCCACTGACTGACTTCTGGAGCGACAAGGAAA    |
| Nrf2 miRNA<br>bottom strand       | CCTGTTTCCTTGTCGCTCCAGAAGTCAGTCAGTGGCCAAAACCTTCTGGAGGACGACAAGGAAAC |
|                                   |                                                                   |
| hPMC2 D247G                       | GAGCCTTAGCCTTGgaTGTGAGATGGTGGGCGTG                                |
|                                   | CACGCCACCATCTCACATCCCAAGGCTAAGGCTC                                |
|                                   |                                                                   |
| hPMC2 D386G                       | GAGCACTGTTCAATTCAGggcGCCAGGCAGCAATGAGG                            |
|                                   | CCTCATTGCTGCCTGGGCGCCCTGAATTGAACAGTGCTC                           |
|                                   |                                                                   |
| QR-EpRE-tk                        | CGCGAATTAAATCGCAGTCACATGACTCAGCAGAATCTGAGCCTAGG                   |
|                                   | TCGACCTAGGCTCAGATTCTGCTGAGTCATGTGACTGCGATTTAATT                   |
